# Supplementary material
Source: PubMed Central journal article supplement (PMC9976590)
Supplement: NIHMS1874150-supplement-Supplementary_Material.pdf [file NIHMS1874150-supplement-Supplementary_Material.pdf]

## 9 Supporting Information

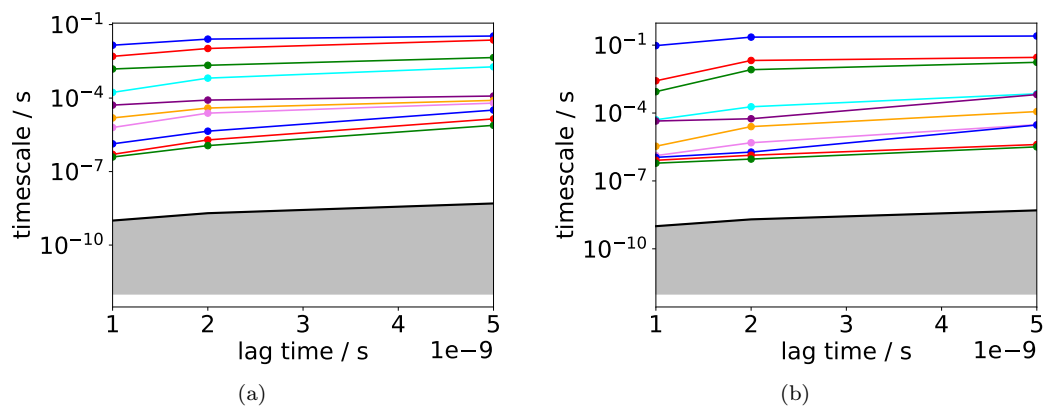

Figure S1: Plot of first 10 implied timescales for unbiased state versus MSM lag time for TRAM models constructed using (a) 50 clusters and (b) 100 clusters.
